# Supplementary material
Source: PubMed Central journal article supplement (PMC8828267)
Supplement: ehp9563.s001.acco.pdf [file ehp9563.s001.acco.pdf]

**Note to readers with disabilities:** *EHP* strives to ensure that all journal content is accessible to all readers. However, some figures and Supplemental Material published in *EHP* articles may not conform to [508 standards](#) due to the complexity of the information being presented. If you need assistance accessing journal content, please contact [ehp508@niehs.nih.gov](mailto:ehp508@niehs.nih.gov). Our staff will work with you to assess and meet your accessibility needs within 3 working days.

### **Supplemental Material**

#### **Environmental Air Pollution and Olfactory Decline in Aging**

Ingrid A. Ekström, Debora Rizzuto, Giulia Grande, Tom Bellander, and Erika J. Laukka

#### **Table of Contents**

**Table S1.** Test statistics of comparisons between characteristics of the drop-out ( $n = 695$ ) and main sample ( $N = 1774$ ). Characteristics are derived from baseline if not indicated otherwise.

**Supplementary Table 1.** Test statistics of comparisons between characteristics of the drop-out ( $n = 695$ ) and main sample ( $N = 1774$ ). Characteristics are derived from baseline if not indicated otherwise.

|                                                           | <i>t</i> -test | df     | <i>p</i> -value | Effect size (Hedges's <i>g</i> )  |
|-----------------------------------------------------------|----------------|--------|-----------------|-----------------------------------|
| Age (years)                                               | -10.54         | 1,2469 | <0.001          | -0.47                             |
| Education (years)                                         | -5.58          | 1,2469 | <0.001          | -0.25                             |
| Odor identification score                                 | -10.89         | 1,2469 | <0.001          | -0.49                             |
| PM <sub>2.5</sub> , average of five years before baseline | -0.59          | 1,2469 | 0.276           | -0.03                             |
| NO <sub>x</sub> , average of five years before baseline   | 0.01           | 1,2469 | 0.504           | 0.00                              |
|                                                           | $\chi^2$       | df     | <i>p</i> -value | Effect size (Pearson's <i>r</i> ) |
| Sex                                                       | 1.53           | 1,2469 | 0.216           | 0.02                              |
