# Supplementary material
Source: PubMed Central journal article supplement (PMC8828267)
Supplement: ehp9563.smcontents.508.pdf [file ehp9563.smcontents.508.pdf]

**Note to readers with disabilities:** *EHP* strives to ensure that all journal content is accessible to all readers. However, some figures and Supplemental Material published in *EHP* articles may not conform to [508 standards](#) due to the complexity of the information being presented. If you need assistance accessing journal content, please contact [ehp508@niehs.nih.gov](mailto:ehp508@niehs.nih.gov). Our staff will work with you to assess and meet your accessibility needs within 3 working days.

### **Supplemental Material**

#### **Environmental Air Pollution and Olfactory Decline in Aging**

Ingrid A. Ekström, Debora Rizzuto, Giulia Grande, Tom Bellander, and Erika J. Laukka

#### **Table of Contents**

**Table S1.** Test statistics of comparisons between characteristics of the drop-out ( $n = 695$ ) and main sample ( $N = 1774$ ). Characteristics are derived from baseline if not indicated otherwise.
